# Supplementary material
Source: Springer Nature journal article supplement (https://www.springermedizin.de/resource/supplementary/13256_2009_1087_MOESM2_ESM.pdf/9646974)

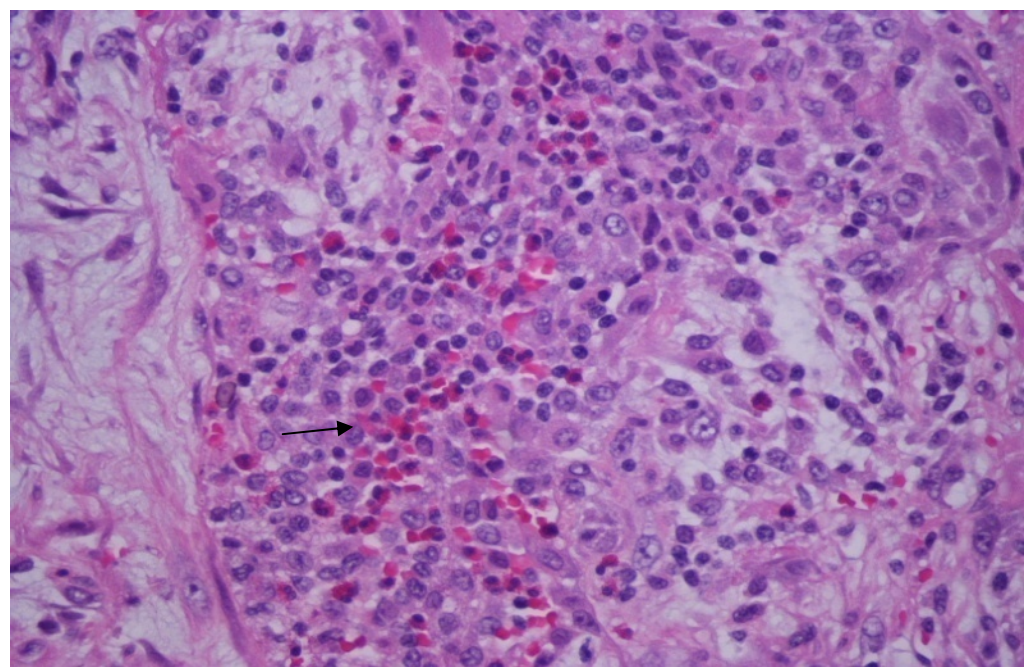

Supplement: MOESM2 [file 9646974]
